# Supplementary material for: Boron–nitrogen analogues of the fluorenyl anion
Source: Royal Society of Chemistry journal article supplement (doi:10.1039/c0dt00028k), 2010-01-01
Supplement: c0dt00028k.pdf [file c0dt00028k.pdf]

*Supplementary Information*

## **Boron-Nitrogen Analogues of the Fluorenyl Anion**

**Stephen M. Mansell, Nicholas C. Norman\* and Christopher A. Russell\***

**Preparation of (1):** Bipy (1.406 g, 9.0 mmol) was added under a positive pressure of argon to lithium foil (125 mg, 18 mmol) suspended in thf (45 cm<sup>3</sup>) and the resulting dark purple mixture was stirred for 16 h forming a dark red/brown solution. The solvent was removed under reduced pressure and toluene was added (45 cm<sup>3</sup>). The mixture was then cooled to -78°C and BCl<sub>3</sub> (1.0 M solution in heptane, 9 cm<sup>3</sup>, 9.0 mmol) was added slowly and the black/orange mixture stirred for 16 h at room temperature. After addition of thf (65 cm<sup>3</sup>), the solution was filtered (porosity 5 sinter and celite) affording a dark red solution. The solvent was removed by vacuum and analysis by <sup>1</sup>H NMR spectroscopy revealed several products. Sublimation (100°C, 1.0 x 10<sup>-2</sup> Torr) gave a red oil (141 mg) which contained the desired product **1** but also contained free bipy and ring-opened thf products. Spectroscopic data for **1**: <sup>1</sup>H NMR (d<sup>5</sup>-pyridine, 300 MHz) 7.78 (m, 2H), 7.54 [br. d, 2H, J(H-H) = 9.18 Hz], 6.38 [qd, 2H, J(H-H) = 6.06 and 0.92 Hz], 6.22 (m, 2H); <sup>11</sup>B NMR (d<sup>5</sup>-pyridine, 96.13 MHz) 16.8 ppm.

**Preparation of (2):** Bipy (1.181 g, 7.6 mmol) was added under a positive pressure of argon to lithium foil (105 mg, 15 mmol) suspended in thf (40 cm<sup>3</sup>) and the resulting dark purple mixture was stirred for 16 h forming a dark red/brown solution. The solvent was removed under reduced pressure and toluene (40 cm<sup>3</sup>) was added. The mixture was cooled to -78°C and PhBCl<sub>2</sub> (0.98 cm<sup>3</sup>, 7.6 mmol) was added slowly and the dark red solution stirred for 16 h at room temperature. The solution was filtered (porosity 5 sinter and celite) and then reduced in volume reduced to *ca.* 4 cm<sup>3</sup> affording red crystals upon storage at -78°C for 48 h (655 mg, 2.7 mmol, 35%). Spectroscopic data for **2**: <sup>1</sup>H NMR (C<sub>6</sub>D<sub>6</sub>, 500 MHz) δ 7.64 [dt, 2H, J(H-H) = 7.21 and 1.22 Hz, bipy H1/H10], 7.49 (m, 2H, Ph H12/H16), 7.30 – 7.23 (m, 3H, Ph H13/H14/H15), 7.19 [dt, 2H, J(H-H) = 9.17 and 1.22 Hz, bipy H4/H7], 6.17 [qd, 2H, J(H-H) = 9.17 and 0.98 Hz, bipy H3/H8], 5.92 [qd, 2H, J(H-H) = 7.21 and 1.22 Hz, bipy H2/H9] ppm. <sup>1</sup>H NMR (NOE) irradiated 7.64 (H1/H10), enhanced 7.49 (H12/H16) and 5.92 (H2/H9). <sup>13</sup>C-<sup>1</sup>H NMR (C<sub>6</sub>D<sub>6</sub>, 125.711 MHz) δ 134.2 (Ph, C12/C16), 129.0 (Ph, C13/C15), 128.7, 128.0, 127.6 (bipy, C1/C10), 119.4, 118.9 (bipy, C4/C7), 115.1 (bipy, C3/C8), 111.3 (bipy, C2/C9) ppm. <sup>13</sup>C-<sup>1</sup>H HMQC δ 134.2 – 7.49, 129.0 – 7.26, 127.6 – 7.64, 118.9 – 7.19, 115.1 – 6.17, 111.3 – 5.92 ppm. <sup>11</sup>B NMR (C<sub>6</sub>D<sub>6</sub>, 96.13 MHz) δ 20.7 ppm. M.S. (E.I.) 244 (M<sup>+</sup>). Mp (toluene) 103 – 105 °C. Sublimed at 60°C, 4 x 10<sup>-4</sup> mbar.

*Supplementary Information*

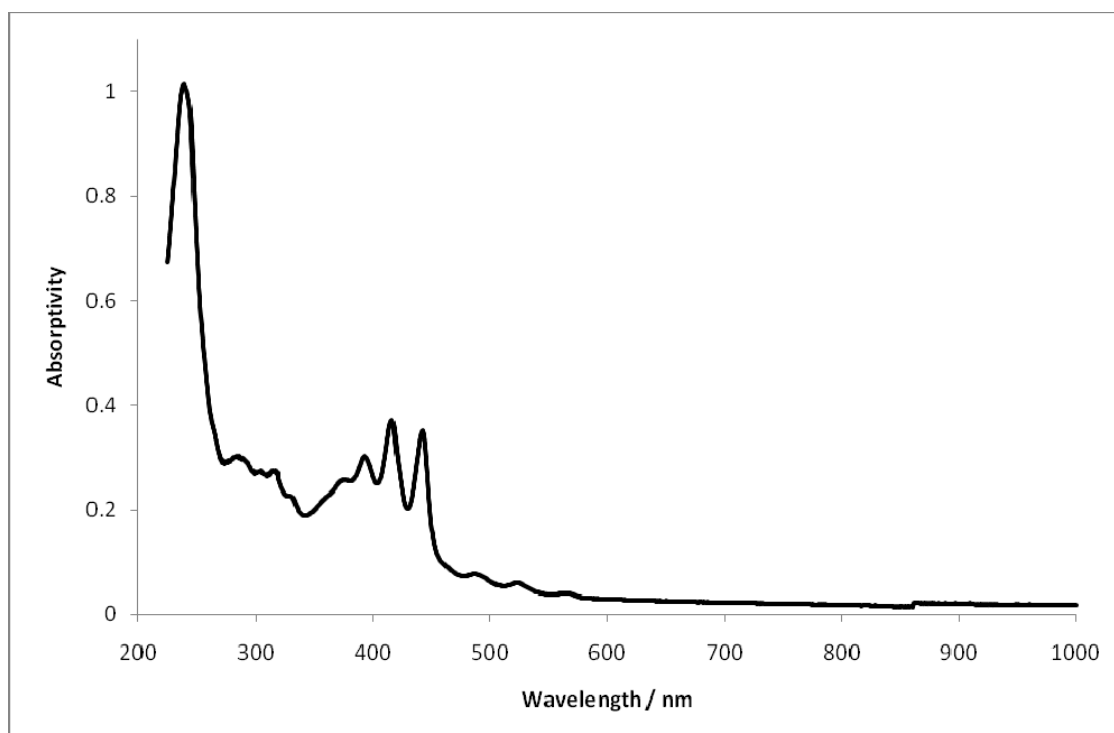

**Figure S1.** Solution state UV-visible measurements for **2** ( $2 \times 10^{-5}$  M) in *n*-hexane.

**Table S1** UV-visible peaks for compound **2**

| $\lambda_{\max}$ / nm | Absorptivity |
|-----------------------|--------------|
| 565                   | 0.041009     |
| 523.5                 | 0.060727     |
| 486.5                 | 0.077557     |
| 442.5                 | 0.350133     |
| 416                   | 0.370483     |
| 392.5                 | 0.302031     |
| 239                   | 1.013842     |

*Supplementary Information*

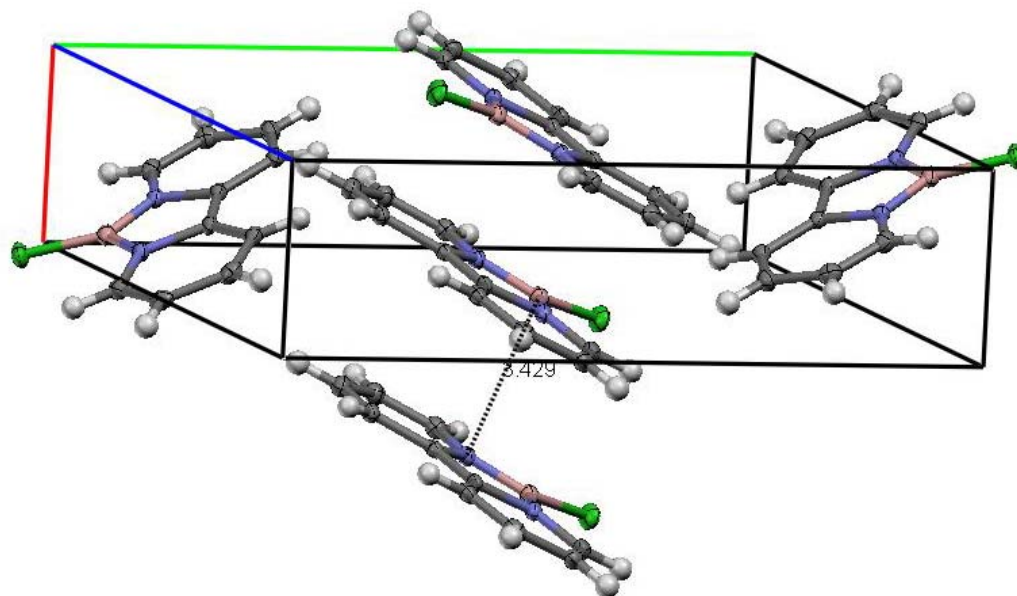

**Figure S2.** A view of the packing in the crystal structure of **1**.

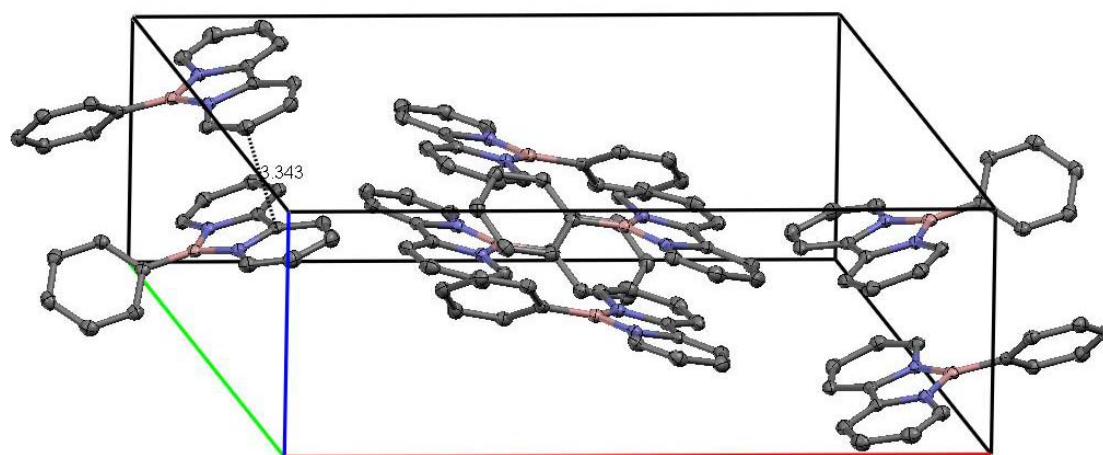

**Figure S3.** A view of the packing in the crystal structure of **2**.
